# Supplementary material for: Discovery of genes that positively affect biomass and stress associated traits in poplar
Source: PubMed Central journal article supplement (PMC11528158; doi:10.3389/fpls.2024.1468905), 2024-10-18
Supplement: DataSheet1.pdf [file DataSheet1.pdf]

| Table S1. Characterization of the T-DNA insertions in activation tagging lines with improved biomass traits. All insertions were mapped in the <i>Populus genome</i> using BLAST analysis tool in Phytozone v1.0 data base ( <a href="https://phytozone.jgi.doe.gov">https://phytozone.jgi.doe.gov</a> ). |                             |               |          |                                                                                    |                                                                                            |                        |                                      |                    |                                                                                                   |  | Arabidopsis Homolog | Feature                      | Distance to gene (Kbp) |
|-----------------------------------------------------------------------------------------------------------------------------------------------------------------------------------------------------------------------------------------------------------------------------------------------------------|-----------------------------|---------------|----------|------------------------------------------------------------------------------------|--------------------------------------------------------------------------------------------|------------------------|--------------------------------------|--------------------|---------------------------------------------------------------------------------------------------|--|---------------------|------------------------------|------------------------|
| Identifier #                                                                                                                                                                                                                                                                                              | Position (BLAST hit)        | Identity (bp) | E-value  | Left flanking loci / Distance from left border to start codon [insertion = 6.7Kbp] | Right flanking loci / Distance from left border to start codon in Kbp [insertion = 6.7Kbp] | Putative Gene function | Activated/Most likely activated loci |                    |                                                                                                   |  |                     |                              |                        |
| A630-7                                                                                                                                                                                                                                                                                                    | Chr14:4,719,725_4,720,217   | 459,494       | 0.0E+00  | PxXaTreH.14G052500                                                                 | 12.6                                                                                       | PxXaTreH.14G052600     | 0.6                                  | PxXaTreH.14G052600 | GROWTH-REGULATING FACTOR 9                                                                        |  | AT2G45480.1         | Intron                       | 0.6                    |
| A541-1                                                                                                                                                                                                                                                                                                    | Chr05:19,283,082_19,283,351 | 264,270       | 4.0E-127 | PxXaAbH.05G161200                                                                  | 24.3                                                                                       | PxXaAbH.05G161300      | 5.4                                  | PxXaAbH.05G161300  | TIC-LIKE PROTEIN                                                                                  |  | AT3G22380.1         | Upstream region              | 5.4                    |
| A689-4                                                                                                                                                                                                                                                                                                    | Chr10:17,990,503_17,991,103 | 589,601       | 0.0E+00  | PxXaAbH.10G146700                                                                  | 0.9                                                                                        | PxXaAbH.10G146800      | 13.6                                 | PxXaAbH.10G146700  | RIBONUCLEASE P SUBUNIT P38                                                                        |  | AT1G13790.2         | 5' untranslated region (UTR) | 0.9                    |
| A726-3                                                                                                                                                                                                                                                                                                    | Chr14:9,913,312_9,913,644   | 327,333       | 2.0E-162 | PxXaTreH.14G114700                                                                 | 17.3                                                                                       | PxXaTreH.14G114800     | 9.3                                  | PxXaTreH.14G114800 | ACTIN-LIKE ATPASE SUPERFAMILY PROTEIN                                                             |  | AT1G30540.1         | Intron                       | 9.3                    |
| A842-3                                                                                                                                                                                                                                                                                                    | Chr10:10,630,097_10,630,565 | 460,470       | 0.0E+00  | PxXaAbH.10G086100                                                                  | 1.7                                                                                        | PxXaAbH.10G086200      | 9.2                                  | PxXaAbH.10G086100  | NO FUNCTIONAL ANNOTATION                                                                          |  | AT3G07100.1         | Upstream region              | 1.7                    |
| A82-2                                                                                                                                                                                                                                                                                                     | Chr06:18,933,087_18,933,370 | 284,284       | 4.0E-144 | PxXaTreH.06G160100                                                                 | 16.4                                                                                       | PxXaTreH.06G160200     | 3.8                                  | PxXaTreH.06G160200 | LARGE SUBUNIT RIBOSOMAL PROTEIN L21E (RP-L21E, RPL21)                                             |  | AT5G78601.1         | Upstream region              | 3.8                    |
| A835-3                                                                                                                                                                                                                                                                                                    | Chr15:11,424,623_11,425,039 | 398,419       | 0.0E+00  | PxXaTreH.15G090100                                                                 | 5.9                                                                                        | PxXaTreH.15G090200     | 6.9                                  | PxXaTreH.15G090100 | UNCHARACTERIZED                                                                                   |  | AT5G51120.1         | Downstream region            | 5.9                    |
| A771-3                                                                                                                                                                                                                                                                                                    | Chr08:711,508_711,709       | 201,202       | 4.0E-98  | PxXaAbH.08G018000                                                                  | 0.8                                                                                        | PxXaAbH.08G019000      | 10.9                                 | PxXaAbH.08G018000  | GLUTARODEXIN FAMILY PROTEIN                                                                       |  | AT5G01420.1         | Upstream region              | 0.8                    |
| A826-3                                                                                                                                                                                                                                                                                                    | Chr01:1,396,275_1,396,440   | 128,168       | 1.00E-22 | PxXaTreH.01G014500                                                                 | 9.4                                                                                        | PxXaTreH.01G014600     | 20.8                                 | PxXaTreH.01G014500 | HELIX-LOOP-HELIX DNA-BINDING DOMAIN (HLH)                                                         |  | AT1G51140.1         | Upstream region              | 9.4                    |
| A927-3                                                                                                                                                                                                                                                                                                    | Chr06:7,439,340_7,439,974   | 477,581       | 2.0E-159 | PxXaTreH.06G072700                                                                 | 0.6                                                                                        | PxXaTreH.06G072800     | 12.7                                 | PxXaTreH.06G072700 | ACYL-COA N-ACYLTRANSFERASE WITH RING-FYVE/PHD-TYPE ZINC FINGER DOMAIN-CONTAINING PROTEIN          |  | AT2G37520.1         | 5' UTR                       | 0.6                    |
| A972-5                                                                                                                                                                                                                                                                                                    | Chr06:909,369_909,805       | 290,349       | 1.0E-99  | PxXaTreH.06G019900                                                                 | 8.5                                                                                        | PxXaTreH.06G011000     | 11.2                                 | PxXaTreH.06G019900 | F-BOX PROTEIN CPR30                                                                               |  | AT4G12560.1         | Upstream region              | 8.5                    |
| A634-2                                                                                                                                                                                                                                                                                                    | Chr08:4,458,012_4,458,561   | 550,550       | 0.0E+00  | PxXaTreH.08G059200                                                                 | 0.0                                                                                        | PxXaTreH.08G059300     | 11.4                                 | PxXaTreH.08G059200 | GZ-GAMMA-BISBOLENE SYNTHASE 1-RELATED                                                             |  | AT5G05350.1         | Exon                         | 0.0                    |
| A635-1                                                                                                                                                                                                                                                                                                    | Chr13:1,946,091_1,946,362   | 260,276       | 1.0E-113 | PxXaTreH.13G026900                                                                 | 17.4                                                                                       | PxXaTreH.13G027000     | 0.2                                  | PxXaTreH.13G027000 | TRANSPORT PROTEIN PARTICLE (TRAPP) COMPLEX SUBUNIT                                                |  | AT6G08000.1         | 5' UTR                       | 0.2                    |
| A822-3                                                                                                                                                                                                                                                                                                    | Chr06:25,176,034_25,176,909 | 839,880       | 0.0E+00  | PxXaAbH.06G217500                                                                  | 9.8                                                                                        | PxXaAbH.06G217600      | 8.1                                  | PxXaAbH.06G217600  | SHN SHINE_1 DNA BINDING / TRANSCRIPTION FACTOR // ETHYLENE-RESPONSIVE TRANSCRIPTION FACTOR ERF003 |  | AT5G25190.1         | Upstream region              | 8.1                    |
| A862-1                                                                                                                                                                                                                                                                                                    | Chr06:11,011,939_11,012,043 | 105,105       | 4.0E-47  | PxXaAbH.06G097000                                                                  | 11.9                                                                                       | PxXaAbH.06G098000      | 0.6                                  | PxXaAbH.06G098000  | NO FUNCTIONAL ANNOTATION                                                                          |  | N/A                 | Upstream region              | 0.6                    |
| A863-3                                                                                                                                                                                                                                                                                                    | Chr08:1,237,541_1,237,795   | 253,255       | 1.0E-125 | PxXaAbH.08G019100                                                                  | 0.2                                                                                        | PxXaAbH.08G019200      | 13.2                                 | PxXaAbH.08G019100  | GTU DOMAIN CONTAINING PROTEIN                                                                     |  | AT3G57810.4         | 5' UTR                       | 0.2                    |
| A836-1                                                                                                                                                                                                                                                                                                    | Chr18:9,569,679_9,570,034   | 350,359       | 1.0E-170 | PxXaAbH.18G066300                                                                  | 19.0                                                                                       | PxXaAbH.18G066400      | 2.0                                  | PxXaAbH.18G066400  | HOMOGENITISATE PHYTYLTRANSFERASE / HPT                                                            |  | AT2G18950.1         | Intron                       | 2.0                    |
| A857-2                                                                                                                                                                                                                                                                                                    | Chr01:36,423,209_36,423,290 | 74,82         | 8.0E-23  | PxXaAbH.01G282600                                                                  | 1.3                                                                                        | PxXaAbH.01G282700      | 27.8                                 | PxXaAbH.01G282600  | E3 UBIQUITIN-PROTEIN LIGASE RGL-G1-RELATED                                                        |  | AT5G14420.1         | Exon                         | 1.3                    |
| A885-1                                                                                                                                                                                                                                                                                                    | Chr10:17,452,998_17,453,190 | 193,193       | 7.0E-95  | PxXaAbH.10G139600                                                                  | 6.3                                                                                        | PxXaAbH.10G139700      | 7.7                                  | PxXaAbH.10G139600  | ZINC FINGER CCH3 DOMAIN-CONTAINING PROTEIN 37-RELATED                                             |  | AT3G12680.1         | 3' UTR                       | 6.3                    |
| A934-2                                                                                                                                                                                                                                                                                                    | Chr18:142,446_142,543       | 96,998        | 7.0E-41  | PxXaAbH.18G001300                                                                  | 0.2                                                                                        | PxXaAbH.18G001400      | 18.0                                 | PxXaAbH.18G001300  | SERINE PROTEASE FAMILY SIC HTRA-RELATED                                                           |  | AT5G27660.2         | Exon                         | 0.2                    |
| A943-1                                                                                                                                                                                                                                                                                                    | Chr04:2,205,837_2,205,924   | 82,88         | 7.0E-30  | PxXaAbH.04G022700                                                                  | 6.5                                                                                        | PxXaAbH.04G022800      | 11.7                                 | PxXaAbH.04G022700  | KINESIN-1 RELATED                                                                                 |  | AT4G08180.1         | Upstream region              | 6.5                    |
| A991-1                                                                                                                                                                                                                                                                                                    | Chr01:38,788,885_38,739,199 | 312,315       | 3.0E-156 | PxXaTreH.01G300500                                                                 | 0.1                                                                                        | PxXaTreH.01G300600     | 11.8                                 | PxXaTreH.01G300500 | MEIOTIC RECOMBINATION PROTEIN SPO11                                                               |  | AT3G13170.1         | 5' UTR                       | 0.1                    |
| B21-1                                                                                                                                                                                                                                                                                                     | Chr11:15,661,025_15,661,305 | 247,281       | 1.7E-88  | PxXaAbH.11G081800                                                                  | 5.8                                                                                        | PxXaAbH.11G081900      | 8.7                                  | PxXaAbH.11G081800  | UBIQUITIN CARBOXYL-TERMINAL HYDROLASE 3642                                                        |  | AT3G14400.1         | Downstream region            | 5.8                    |
| A613-2                                                                                                                                                                                                                                                                                                    | Chr01:48,013,773_48,014,052 | 229,281       | 2.0E-68  | PxXaAbH.01G351100                                                                  | 12.2                                                                                       | PxXaAbH.01G351200      | 12.8                                 | PxXaAbH.01G351100  | BOI-RELATED E3 UBIQUITIN-PROTEIN LIGASE 3-RELATED                                                 |  | AT1G12920.1         | Upstream region              | 12.2                   |
| A874-9                                                                                                                                                                                                                                                                                                    | Chr02:17,294,793_17,294,986 | 193,194       | 2.0E-93  | PxXaTreH.02G173800                                                                 | 8.5                                                                                        | PxXaTreH.02G173900     | 16.3                                 | PxXaTreH.02G173800 | DIMETHYLANILINE MONOOXYGENASE                                                                     |  | AT1G48910.1         | Upstream region              | 9.6                    |
| A901-5                                                                                                                                                                                                                                                                                                    | Chr12:8,571,009_8,571,304   | 239,298       | 1.0E-66  | PxXaTreH.12G059500                                                                 | 25.1                                                                                       | PxXaTreH.12G059600     | 1.8                                  | PxXaTreH.12G059600 | GDSL-MOTIF LIPASE/HYDROLASE FAMILY PROTEIN                                                        |  | AT5G62930.1         | Intron                       | 1.8                    |
| B0-4                                                                                                                                                                                                                                                                                                      | Chr04:811,140_811,512       | 373,373       | 0.0E+00  | PxXaTreH.04G008500                                                                 | 2.6                                                                                        | PxXaTreH.04G008600     | 12.7                                 | PxXaTreH.04G008500 | GLYOXALASE I HOMOLOG                                                                              |  | AT3G53700.1         | Upstream region              | 2.6                    |
| A915-2                                                                                                                                                                                                                                                                                                    | Chr14:5,531,694_5,531,727   | 31,34         | 1.6E-03  | PxXaAbH.14G064200                                                                  | 0.2                                                                                        | PxXaAbH.14G064300      | 22.1                                 | PxXaAbH.14G064200  | PHOSPHATIDYLINOSITOL N-ACETYLGUCOSAMINYTRANSFERASE SUBUNIT P-LIKE PROTEIN                         |  | AT4G00440.3         | Intron                       | 0.2                    |
| A975-4                                                                                                                                                                                                                                                                                                    | Chr10:7,703,668_7,704,334   | 388,388       | 0.0E+00  | PxXaAbH.10G054200                                                                  | 0.3                                                                                        | PxXaAbH.10G054300      | 28.9                                 | PxXaAbH.10G054200  | TOPPA_4 TYPE ONE SERINE/THREONINE PROTEIN PHOSPHATASE 4                                           |  | AT2G39840.1         | Upstream region              | 0.3                    |
| A955-1                                                                                                                                                                                                                                                                                                    | Chr07:881,027_881,480       | 445,454       | 0.0E+00  | PxXaTreH.07G010100                                                                 | 14.1                                                                                       | PxXaTreH.07G010200     | 1.4                                  | PxXaTreH.07G010200 | U-BOX DOMAIN-CONTAINING PROTEIN 50-RELATED                                                        |  | AT5G65500.1         | Exon                         | 1.4                    |
| A979-4                                                                                                                                                                                                                                                                                                    | Chr01:17,597,610_17,597,872 | 263,263       | 8.9E-133 | PxXaAbH.01G162300                                                                  | 65.1                                                                                       | PxXaAbH.01G162400      | 1.2                                  | PxXaAbH.01G162400  | ABC TRANSPORTER G FAMILY MEMBER 35-RELATED                                                        |  | AT1G59870.1         | Exon                         | 1.2                    |
| 1999-5                                                                                                                                                                                                                                                                                                    | Chr12:10,989,445_10,989,698 | 226,254       | 1.4E-85  | PxXaAbH.12G082300                                                                  | 7.1                                                                                        | PxXaAbH.12G082400      | 9.2                                  | PxXaAbH.12G082300  | PROTEIN MEI2-LIKE 1-RELATED                                                                       |  | AT5G61960.3         | 3' UTR                       | 7.1                    |
| 795L-6                                                                                                                                                                                                                                                                                                    | Chr06:3,283_1_3,340.4       | 140,149       | 1.9E-58  | PxXaTreH.06G000100                                                                 | 0.0                                                                                        | PxXaTreH.06G000200     | 13.2                                 | PxXaTreH.06G000100 | PENTATRICOPEPTIDE REPEAT-CONTAINING PROTEIN                                                       |  | AT5G01560.4         | Exon                         | 0.0                    |
| 826L-3                                                                                                                                                                                                                                                                                                    | Chr08:3,531,725_3,531,969   | 245,245       | 5.3E-123 | PxXaAbH.08G048500                                                                  | 13.0                                                                                       | PxXaAbH.08G048600      | 3.0                                  | PxXaAbH.08G048600  | WALL-ASSOCIATED RECEPTOR KINASE GALACTURONAN-BINDING DOMAIN                                       |  | AT5G02070.1         | Upstream region              | 3.0                    |
| 345L-1                                                                                                                                                                                                                                                                                                    | Chr10:16,317,536_16,317,975 | 440,440       | 0.0E+00  | PxXaAbH.10G123500                                                                  | 17.4                                                                                       | PxXaAbH.10G123600      | 3.8                                  | PxXaAbH.10G123600  | NUCLEAR TRANSPORT FACTOR 2 (NTF2) FAMILY PROTEIN                                                  |  | AT1G13730.2         | 3' UTR                       | 3.8                    |
| 501L-5                                                                                                                                                                                                                                                                                                    | Chr14:1,957,182_1,957,297   | 114,125       | 8.6E-44  | PxXaTreH.14G021900                                                                 | 17.7                                                                                       | PxXaTreH.14G022000     | 0.0                                  | PxXaTreH.14G022000 | MEMBRANE PROTEIN YCF1-RELATED                                                                     |  | ATMG000370.1        | Exon                         | 0.0                    |
| 575L-1                                                                                                                                                                                                                                                                                                    | Chr01:34,466,030_34,466,136 | 107,107       | 2.5E-48  | PxXaAbH.01G268000                                                                  | 2.0                                                                                        | PxXaAbH.01G268100      | 16.6                                 | PxXaAbH.01G268000  | DOUBLE-STRANDED RNA-BINDING PROTEIN 3                                                             |  | AT3G26932.1         | 3' UTR                       | 2.0                    |
| 659L-1                                                                                                                                                                                                                                                                                                    | Chr06:23,150,863_23,151,505 | 642,643       | 0.0E+00  | PxXaTreH.06G205900                                                                 | 3.5                                                                                        | PxXaTreH.06G206000     | 9.1                                  | PxXaTreH.06G205900 | HISTONE H2A (H2A)                                                                                 |  | AT1G52740.1         | Upstream region              | 3.5                    |
| 707L-1                                                                                                                                                                                                                                                                                                    | Chr01:33,916,483_33,916,815 | 331,333       | 5.5E-168 | PxXaTreH.01G268700                                                                 | 24.4                                                                                       | PxXaTreH.01G268800     | 7.2                                  | PxXaTreH.01G268800 | HYPOTHETICAL PROTEIN                                                                              |  | AT3G01960.1         | Upstream region              | 7.2                    |
| 994L-1                                                                                                                                                                                                                                                                                                    | Chr14:4,373,677_4,374,201   | 482,553       | 1.8E-172 | PxXaTreH.14G048000                                                                 | 26.7                                                                                       | PxXaTreH.14G048100     | 3.8                                  | PxXaTreH.14G048100 | AUXIN-REGULATED PROTEIN-RELATED                                                                   |  | AT3G60690.1         | Upstream region              | 3.8                    |
