# Supplementary material for: Discovery of genes that positively affect biomass and stress associated traits in poplar
Source: PubMed Central journal article supplement (PMC11528158; doi:10.3389/fpls.2024.1468905), 2024-10-18
Supplement: DataSheet2.pdf [file DataSheet2.pdf]

**Table S2.** Primers used for the real-time RT-PCR analysis of the genes flanking the T-DNA insertion site.

| <b>Gene Name</b>          | <b>Primer 5'-3' sequence</b>                                            |
|---------------------------|-------------------------------------------------------------------------|
| <i>PtXaTreH.14G052500</i> | <b>Fwd</b> -TTGGCTAGTAACGGTGCAGG<br><b>Rev</b> -TCAACCGGTAGCAGCACATT    |
| <i>PtXaTreH.14G052600</i> | <b>Fwd</b> -TGGATCCAGAACCTGGGAGA<br><b>Rev</b> -TGAGGTGATGGTTTTTCAGAAGC |
| <i>PtXaAlbH.05G161200</i> | <b>Fwd</b> -CGCACTGTGAAACCACCAAG<br><b>Rev</b> -CAAGGTGGATGAGAGCAGCA    |
| <i>PtXaTreH.01G014500</i> | <b>Fwd</b> -ACAGGGGACTAAATGGAGCAC<br><b>Rev</b> -ACTCGGTGCGGATTGATACC   |
| <i>PtXaAlbH.10G146700</i> | <b>Fwd</b> -AAGAGCAGCCTTTTGTCCCC<br><b>Rev</b> -TGAGCCACTTTCCCCAACAC    |
| <i>PtXaAlbH.08G010800</i> | <b>Fwd</b> -GAGGGGCTGAAAAGATGAAAGG<br><b>Rev</b> -CCTGCGCTTCGAGACTAGG   |
| <i>PtXaAlbH.10G086200</i> | <b>Fwd</b> -GGAACA ACTGCCTTGCTGAC<br><b>Rev</b> -TCCAATTTCCAATCCCCGACA  |
| <i>PtXaTreH.15G090200</i> | <b>Fwd</b> -GCAGCAGCAATGCTCACTTT<br><b>Rev</b> -ACGCGGTTCCATAAGTACCA    |
| <i>PtXaTreH.06G072700</i> | <b>Fwd</b> -AGCGTAATCCATTTCCGGTGA<br><b>Rev</b> -ACGCATTTCGTAGGCGATTCT  |

**Table S3.** Primers used for cloning of the candidate genes following Gateway procedure.

| <b>Gene Name</b>          | <b><i>attB</i> primer 5'-3' sequence</b>                                                                                                          |
|---------------------------|---------------------------------------------------------------------------------------------------------------------------------------------------|
| <i>PtXaTreH.14G052500</i> | <b>Fwd-</b> GGGGACAAGTTTGTACAAAAAAGCAGGCT atggetacgttacagtactctctcc<br><b>Rev-</b> GGGGACCACTTTGTACAAGAAAGCTGGGT tcaggacatgagaatcgaaca            |
| <i>PtXaTreH.14G052600</i> | <b>Fwd-</b> GGGGACAAGTTTGTACAAAAAAGCAGGCTatggagaaaagagtatctga<br><b>Rev-</b> GGGGACCACTTTGTACAAGAAAGCTGGGTctaagaagaaaggtttttgtt                   |
| <i>PtXaAlbH.05G161200</i> | <b>Fwd-</b> GGGGACAAGTTTGTACAAAAAAGCAGGCTatggaccttagtaaggcaacgctagagatc<br><b>Rev-</b> GGGGACCACTTTGTACAAGAAAGCTGGGTttagcgactgttgcaagaggactaacggc |
